# Supplementary material for: Reconstructing the plinian and co-ignimbrite sources of large volcanic eruptions: A novel approach for the Campanian Ignimbrite
Source: PubMed Central journal article supplement (PMC4756320; doi:10.1038/srep21220), 2016-02-17
Supplement: srep21220-s1.pdf [file srep21220-s1.pdf]

## SUPPLEMENTAL INFORMATION

# Reconstructing the plinian and co-ignimbrite sources of large volcanic eruptions:

## A novel approach for the Campanian Ignimbrite

Alejandro Marti<sup>1\*</sup>, Arnau Folch<sup>1</sup>, Antonio Costa<sup>2</sup>, and Samantha Engwell<sup>3</sup>

<sup>1</sup> Barcelona Supercomputing Center (BSC-CNS), Barcelona, Spain

<sup>2</sup> Istituto Nazionale di Geofisica e Vulcanologia, Sezione di Bologna, Italy

<sup>3</sup> Istituto Nazionale di Geofisica e Vulcanologia, Sezione di Pisa, Italy

\*[Alejandro.Marti@bsc.es](mailto:Alejandro.Marti@bsc.es)

### SUPPLEMENTAL INFORMATION S1

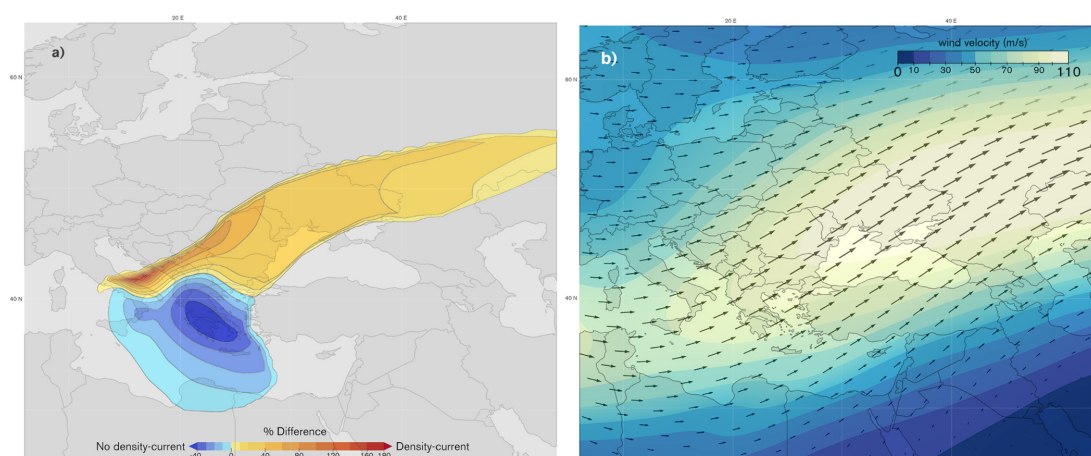

Figure S1. (a) Impact of gravity current on the deposit (variation in %). Positive values show areas where tephra deposition increases when accounting for gravity-current effects; negative indicate lesser tephra deposition. (b) Wind field at ~32 km elevation for the meteorological field that best represents the (unknown) meteorological conditions at the time of the CI eruption (7th December 1991). Figure generated using Autodesk(R) Maya(R).
